# Supplementary material
Source: PubMed Central journal article supplement (PMC3873744)
Supplement: NIHMS538356-supplement-Supplementary_File.pdf [file NIHMS538356-supplement-Supplementary_File.pdf]

**Supplementary Material**

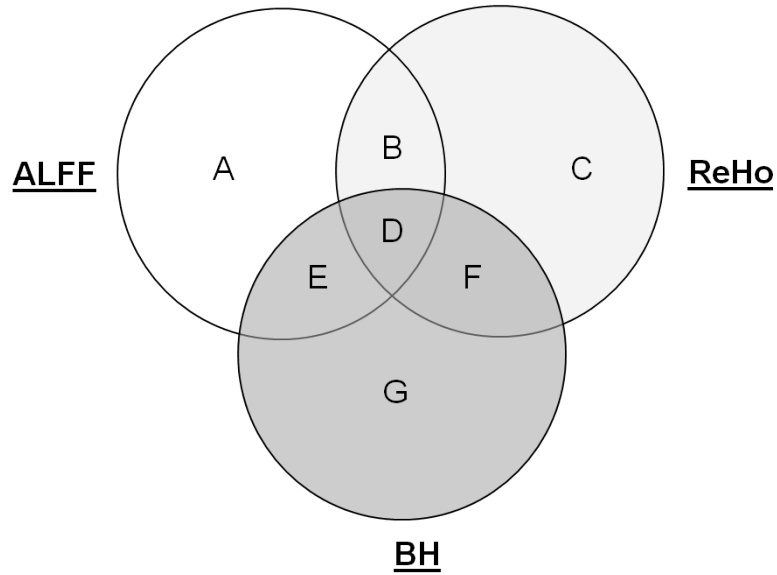

**Figure S1.** A) unique contribution of amplitude of low frequency fluctuations (ALFF), B) ALFF and regional homogeneity (ReHo), C) unique contribution of ReHo, D) ALFF, ReHo and breath hold (BH) responses, E) ALFF and BH, F) ReHo and BH, G) unique contribution of BH.

*Equations:* The equations used to compute the unique and overlapping contributions of ALFF, ReHo and BH responses to the variance of task activations are shown below. Model<sub>i</sub> represents the linear regression model used to obtain the  $r^2$  values.

$$r_{ALFF}^2 = r_{ALFF}^2 - (r_{ALFF,ReHo}^2 + r_{ALFF,BH}^2 + r_{ReHo,BH}^2 - r_{ALFF,ReHo,BH}^2 - r_{ALFF,ReHo}^2 - r_{ALFF,BH}^2 - r_{ReHo,BH}^2)$$

$$r_{ReHo}^2 = r_{ReHo}^2 + r_{ALFF,ReHo}^2 - r_{ALFF,ReHo}^2 - r_{ALFF,ReHo,BH}^2$$

$$r_{BH}^2 = r_{BH}^2 + r_{ALFF,BH}^2 + r_{ReHo,BH}^2 - r_{ALFF,BH}^2 - r_{ReHo,BH}^2 - r_{ALFF,ReHo,BH}^2$$

$$r_{ALFF,ReHo}^2 = r_{ALFF,ReHo}^2 + r_{ALFF,ReHo,BH}^2 - r_{ALFF,ReHo,BH}^2 - r_{ALFF,ReHo}^2 - r_{ALFF,BH}^2 - r_{ReHo,BH}^2$$

$$r_{ALFF,BH}^2 = r_{ALFF,BH}^2 - r_{ALFF,ReHo,BH}^2 - r_{ALFF,ReHo}^2 - r_{ALFF,BH}^2$$

$$r_{ReHo,BH}^2 = r_{ReHo,BH}^2 - r_{ALFF,ReHo,BH}^2 - r_{ALFF,ReHo}^2 - r_{ReHo,BH}^2$$

$$r_{ALFF,ReHo,BH}^2 = r_{ALFF,ReHo,BH}^2 - r_{ALFF,ReHo}^2 - r_{ALFF,BH}^2 - r_{ReHo,BH}^2$$
